# Supplementary material for: Influence of zinc oxide nanoparticles on anaerobic digestion of waste activated sludge and microbial communities
Source: Royal Society of Chemistry journal article supplement (doi:10.1039/d0ra08671a), 2021-01-01
Supplement: d0ra08671a1.pdf [file d0ra08671a1.pdf]

### Supplementary data

Table S1 the basic indices of the experimental activated sludge

| Index                                         | Fresh activated | Seeding sludge |
|-----------------------------------------------|-----------------|----------------|
| pH                                            | 7.2             | 7.3            |
| TSS ( $\text{mg}\cdot\text{L}^{-1}$ )         | 16370           | 13880          |
| VS S( $\text{mg}\cdot\text{L}^{-1}$ )         | 11520           | 5520           |
| Total COD ( $\text{mg}\cdot\text{L}^{-1}$ )   | 21340           | 10476          |
| Soluble COD ( $\text{mg}\cdot\text{L}^{-1}$ ) | 6663.6          | 2754.8         |

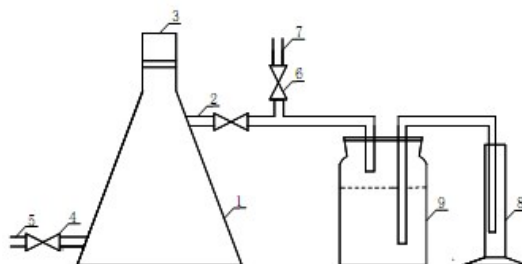

Fig. S1. Experimental setup of anaerobic digestion. 1. Anaerobic digestion reactor; 2. Gas collector; 3. Rubber stopper; 4. Pinchcock; sample collection; 6. Pinchcock; Gas sample connection; 8. Measuring cylinder; 9. Wide-mouth bottle

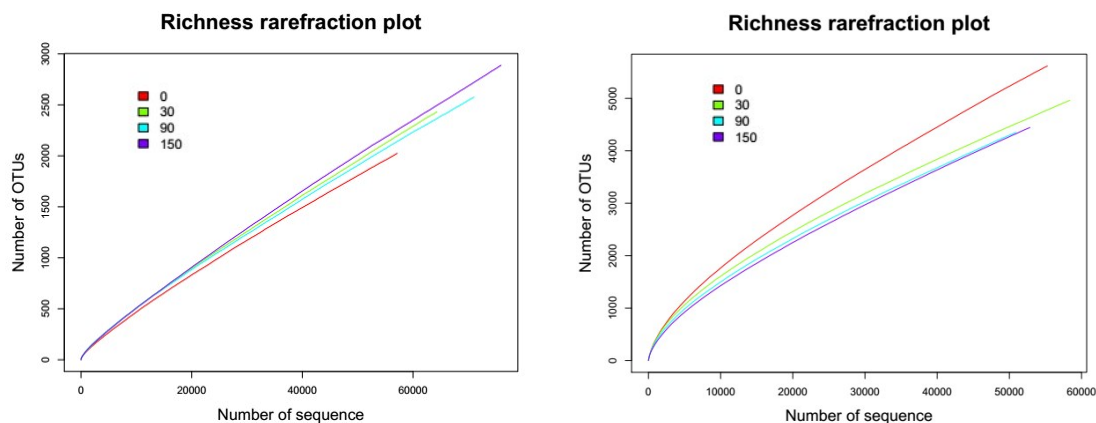

**Fig. S2** Richness rarefaction plot of species in the activated sludge. (A) Archaeal; (B) Bacterial.

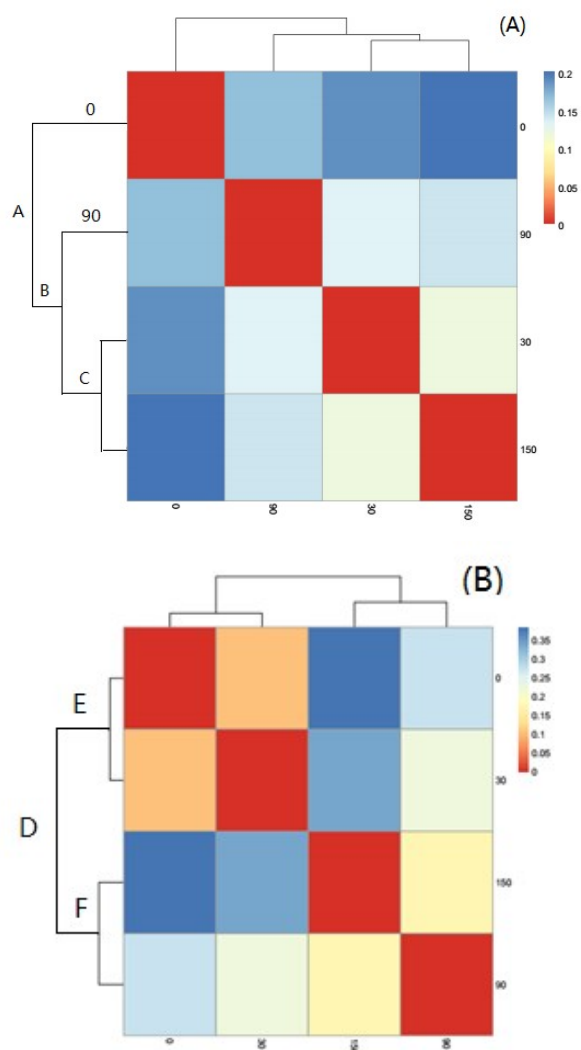

**Fig. S3.** Sample distance heatmap (A: Archaeal; B: Bacterial)
